# Supplementary material for: Modulation of Re-initiation of Measles Virus Transcription at Intergenic Regions by PXD to NTAIL Binding Strength
Source: PLOS journal article supplement (doi:10.1371/journal.ppat.1006058), 2016-12-09
Supplement: S4 (10.1371/journal.ppat.1006058.s004) [file journal.ppat.1006058.s004]

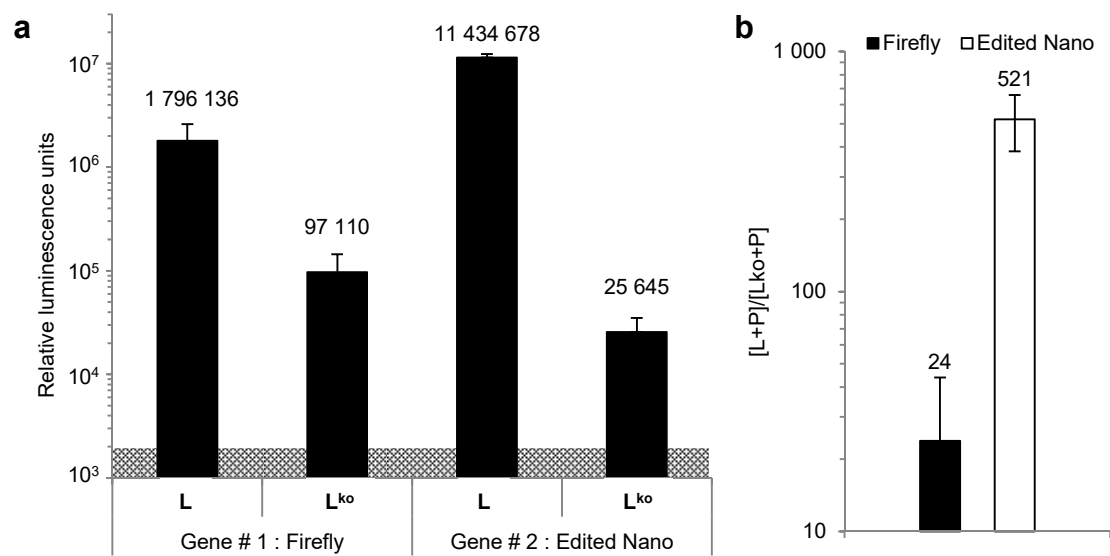

**S4 Fig. Improved signal ratio of edited Nano gene over Firefly gene upon transcription by P+L MeV polymerase** with (a) raw data and (b) improved dynamic range. Data were obtained using dual-luciferase minigenome with Firefly and edited Nano gene separated by canonical N-P IGRs in the presence of *wt*, N, P and L or a truncated inactive L ( $L^{ko}$ ) as a negative control to measure the translation background from the minigenome transcribed by the T7 polymerase. The level of the background RLU signal is shown by the grey zone in (a)
