# Supplementary material for: Modulation of Re-initiation of Measles Virus Transcription at Intergenic Regions by PXD to NTAIL Binding Strength
Source: PLOS journal article supplement (doi:10.1371/journal.ppat.1006058), 2016-12-09
Supplement: S8 (10.1371/journal.ppat.1006058.s008) [file journal.ppat.1006058.s008]

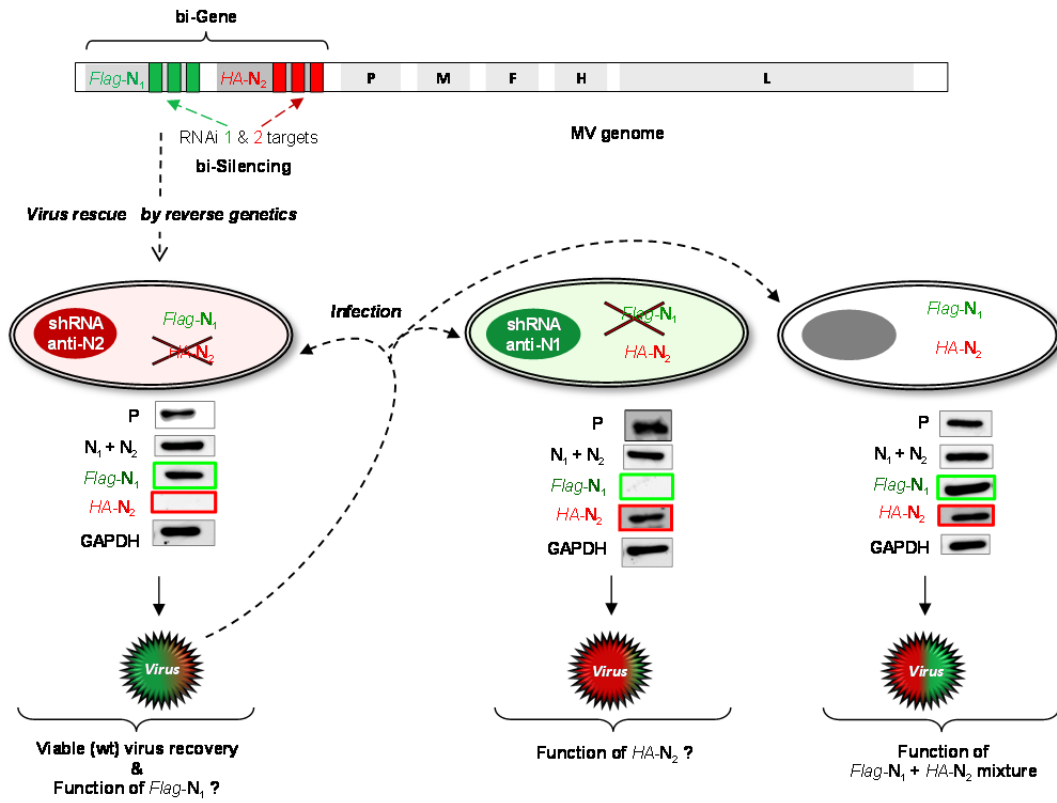

**S8 Fig. Principle of biG-biS MeV viruses selective expression of the duplicated N1 and N2 gene according to the Vero cell host (see [3] for details).**
