# Supplementary material for: Modulation of Re-initiation of Measles Virus Transcription at Intergenic Regions by PXD to NTAIL Binding Strength
Source: PLOS journal article supplement (doi:10.1371/journal.ppat.1006058), 2016-12-09
Supplement: S9 (10.1371/journal.ppat.1006058.s009) [file journal.ppat.1006058.s009]

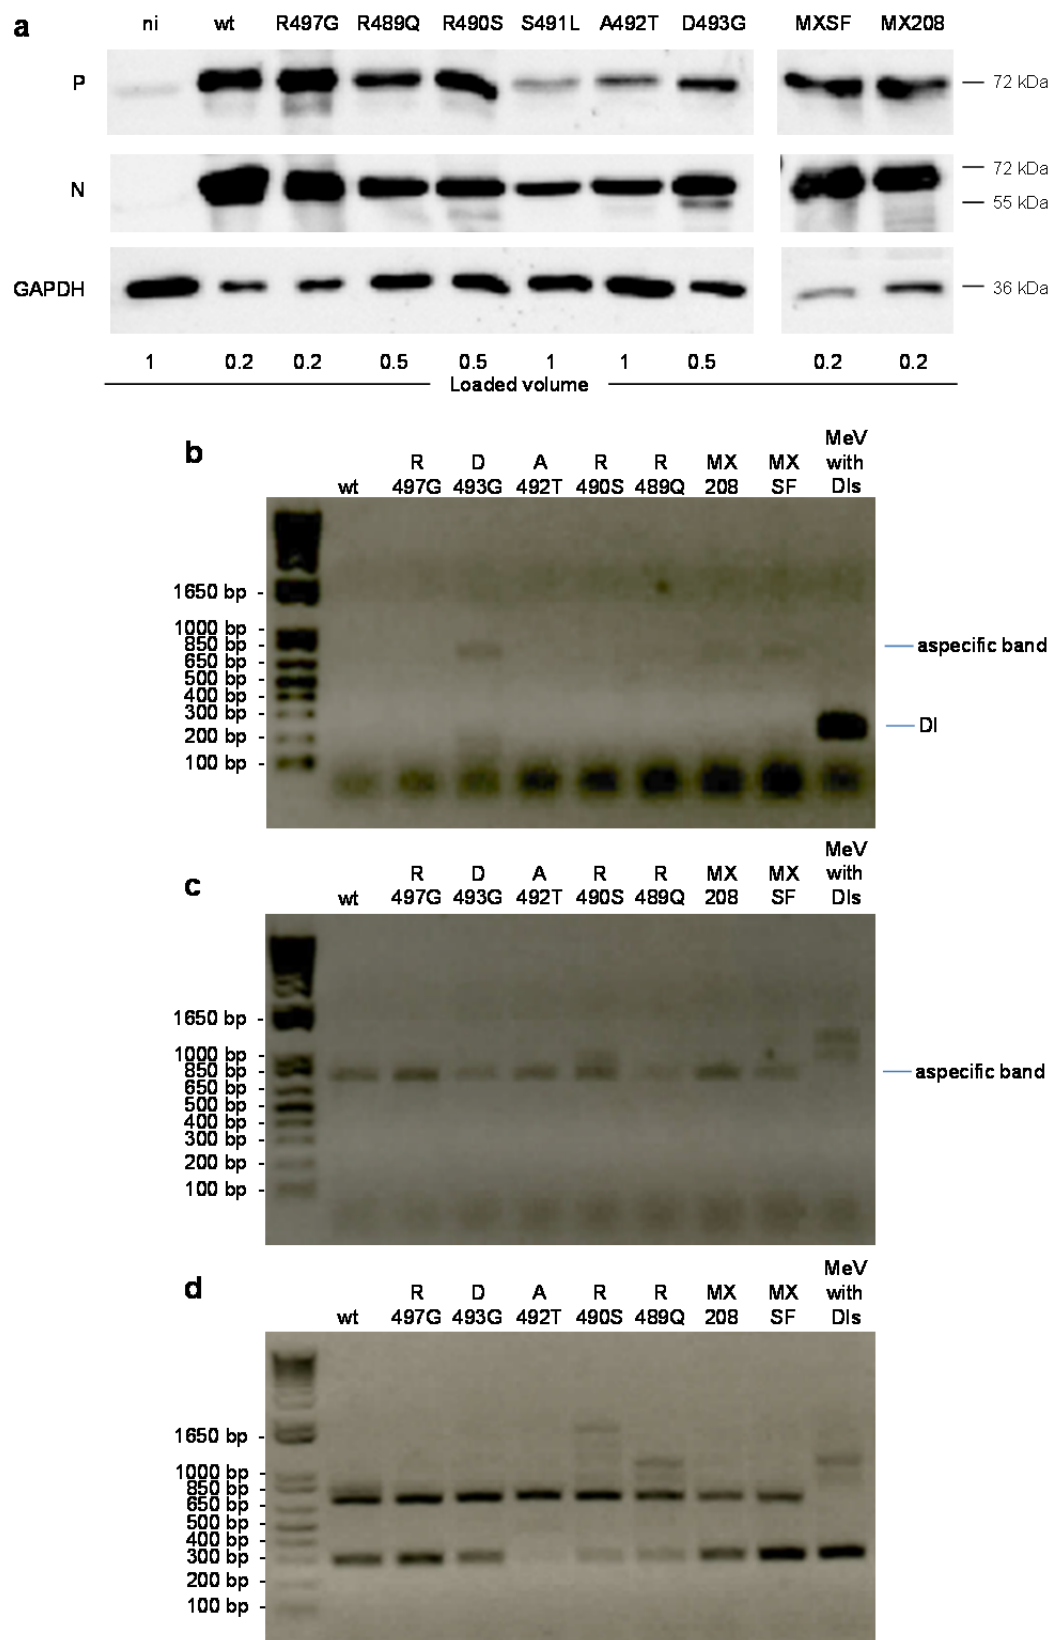

**S9 Fig. Characterization of recombinant unigene MeV expressing N<sub>TAIL</sub> variants** (a) Western blot analysis of N and P expression in Vero cells infected by recombinant unigene viruses. (b-d) lack of detectable contamination by internally deleted (b) or copyback (c) DIs and (d) genome of each recombinant virus as detected by RT-PCR (see [1] for method).

1. Brunel J, Choppy D, Dosnon M, Bloyet LM, Devaux P, et al. (2014) Sequence of events in measles virus replication: role of phosphoprotein-nucleocapsid interactions. *Journal of virology* 88: 10851-10863.
